1 **Inbreeding reduces fitness of seed beetles under thermal**  
2 **stress**

3

4 Edward Ivimey-Cook<sup>1\*</sup>, Sophie Bricout<sup>2</sup>, Victoria Candela<sup>2</sup>, Alexei A. Maklakov<sup>1</sup> and  
5 Elena C. Berg<sup>2</sup>

6

7 <sup>1</sup>School of Biological Sciences, University of East Anglia, Norwich Research Park, Norwich, UK

8 <sup>2</sup>Department of Computer Science, Mathematics, and Environmental Science, The American University  
9 of Paris, France

10

11 **Corresponding author**

12 [\\*E.Ivimey-Cook@uea.ac.uk](mailto:E.Ivimey-Cook@uea.ac.uk)

13

14 **Keywords**

15 Climate change, inbreeding, fertility, *Callosobruchus maculatus*, mutation load, environmental stress

16

17

18

19

20

21

22

23

24

25

26

27

28

29

30 **Abstract**

31 Human-induced environmental change can influence populations both at the global  
32 level through climatic warming and at the local level through habitat fragmentation.  
33 As populations become more isolated, they can suffer from high levels of inbreeding  
34 which contributes to a reduction in fitness, termed inbreeding depression. However, it  
35 is still unclear if this increase in homozygosity also results in a corresponding  
36 increase in sensitivity to stressful conditions, which could intensify the already  
37 detrimental effects of environmental warming. Here, in a fully factorial design, we  
38 assessed the life-long impact of increased mutation load and elevated temperature  
39 on key life history traits in the seed beetle, *Callosobruchus maculatus*. We found that  
40 beetles raised at higher temperatures had far reduced fitness and survival than  
41 beetles from control temperatures. Importantly, these negative effects were  
42 exacerbated in inbred beetles as a result of increased mutation load, with further  
43 detrimental effects manifesting on individual hatching probability and lifetime  
44 reproductive success. These results reveal the harmful impact that increasing  
45 temperature and likelihood of habitat fragmentation due to anthropogenic changes  
46 in environmental conditions could have on populations of organisms worldwide.

47

48

49

50

51

52

53

54

55

56

## 57 **Introduction**

58 The Earth's average annual temperature has risen by approximately 0.85°C over the  
59 past 100 years (Pereira *et al.*, 2012; Pachauri *et al.*, 2014) with the current rate of  
60 warming nearly double that of previous decades (Rosenzweig *et al.*, 2008; Pereira *et al.*,  
61 *et al.*, 2012; Pachauri *et al.*, 2014). One of the major contributors to this rise in annual  
62 temperature is anthropogenic greenhouse gas emissions, which have caused more  
63 than half of the observed increase in global average surface temperature from 1951  
64 to 2010 (Pereira *et al.*, 2012; Pachauri *et al.*, 2014). This unprecedented rise in  
65 temperature is already affecting natural systems (Pereira *et al.*, 2012; Pachauri *et al.*,  
66 2014; Trisos *et al.*, 2020), driving many organisms to either adapt, move, or go  
67 extinct (Holt, 1990; Pereira *et al.*, 2012; Trisos *et al.*, 2020).

68 In particular, a warmer and more unpredictable climate has forced many  
69 organisms, from both terrestrial and marine environments, to shift geographic ranges,  
70 alter seasonal activities or migration patterns, or change interactions with other  
71 species (Barnett *et al.*, 2001; Root *et al.*, 2003). For instance, it is predicted that  
72 many terrestrial and freshwater species will significantly alter range boundaries and  
73 move polewards in response to anthropogenic warming as thermal tolerances are  
74 likely to be exceeded nearer the equator (Hickling *et al.*, 2006; Thomas, 2010). This  
75 shift in geographical range may also lead to corresponding changes in species  
76 interactions within ecosystems. For instance, a review comprising data from 688  
77 published studies found significant, multitrophic effects of global environmental  
78 change acting on both mutualistic and antagonist interactions among species within  
79 an ecosystem (Tylianakis *et al.*, 2008). Species interactions could also change as a  
80 result of altered migration patterns. For example, in response to warmer winters,  
81 several bird species have substantially reduced the migration distance between  
82 breeding and overwintering grounds (Visser *et al.*, 2009).

83           A wealth of literature has also revealed how changes in climatic conditions  
84 can have cascading effects on the life history and ability of an organism to adapt to  
85 shifts in phenology (Davis & Shaw, 2001; Gottfried *et al.*, 2012; Norberg *et al.*, 2012;  
86 Pearson *et al.*, 2014; Muñoz *et al.*, 2015; Seebacher *et al.*, 2015). Some species are  
87 able to adapt sufficiently by undergoing rapid evolutionary change. For example, in  
88 response to a five-year period of drought, the southern Californian plant species  
89 *Brassica rapa* shifted to an earlier flowering time and increased the overall duration  
90 of flowering. Subsequently, this change in flowering time then led to an increase in  
91 individual fitness as a result of escaping the harsh conditions of late-season drought  
92 (Franks & Weis, 2008). Other species, which have been unable to adapt as quickly,  
93 have seen substantial population declines. For example, in several European bird  
94 species, warmer temperatures have resulted in phenological mismatch between  
95 breeding opportunities and food peaks (Visser *et al.*, 1998, 2012; Both *et al.*, 2006;  
96 Jiguet *et al.*, 2007).

97           The ability of an organism to undergo rapid adaptation to novel ecological  
98 conditions such as elevated temperature is reliant on the existence of standing  
99 genetic variation within a population (Davis & Shaw, 2001; Orr & Betancourt, 2001;  
100 Blows & Hoffmann, 2005; Willi *et al.*, 2006; Berger *et al.*, 2020). Therefore, a  
101 reduction in genetic diversity could restrict the evolvability of populations to  
102 environmental stochasticity. Climate warming and increased anthropogenic land use  
103 change (Opdam & Wascher, 2004; Liao & Reed, 2009) have led to habitat  
104 fragmentation (and habitat loss), which can induce genetic constraints on adaptation  
105 by increasing the levels of inbreeding (Leimu *et al.*, 2006) as populations become  
106 more isolated. This increase in genetic homozygosity within a population often results  
107 in a significant reduction to survival and fertility through the expression of deleterious,  
108 recessive mutations (Keller & Waller, 2002; Charlesworth & Willis, 2009), termed  
109 inbreeding depression (Charlesworth & Charlesworth, 1987).

110 In the wild, inbreeding depression is both widespread and variable in  
111 magnitude within and between populations (Keller & Waller, 2002; Huisman *et al.*,  
112 2016). Importantly for conservation biologists this increase in mutation load  
113 (Kirkpatrick & Jarne, 2000) and loss of genetic diversity (Gibbs, 2001) could  
114 potentially exaggerate a population's sensitivity to environmental stress and increase  
115 the likelihood of extinction (Bijlsma *et al.*, 1999; Fox *et al.*, 2006, 2011; Franke &  
116 Fischer, 2015).

117 Inbred individuals may have a heightened sensitivity to increased  
118 environmental stress, through factors such as temperature, competition, nutrition,  
119 exposure to harmful chemicals, parasitism and desiccation. This sensitivity has been  
120 investigated in several species to date (See Armbruster & Reed, 2005, Agrawal &  
121 Whitlock, 2010 and Fox & Reed, 2011), including model systems such as the seed  
122 beetle *Callosobruchus maculatus* (Fox *et al.*, 2006, 2011; Fox & Stillwell, 2009; Fox &  
123 Reed, 2010) and the fruit fly *Drosophila melanogaster* (Yun & Agrawal, 2014).  
124 However, crucially for conservation research, the link between thermal stress and  
125 inbreeding depression remains unclear. In addition, a recent study by Yun and  
126 Agrawal (2014) highlighted that much of the link between environmental stress and  
127 inbreeding depression could be a result of density dependence (competition stress)  
128 driving the interaction.

129 Despite this, a recent study has shown that increasing temperature results in  
130 significantly more genome-wide *de novo* mutations (Berger *et al.*, 2020). However,  
131 empirical support for a corresponding increase in inbreeding depression owing to the  
132 accumulation of these thermal stress-induced mutations is varied. For instance, in a  
133 series of studies, Fox *et al.* found that inbreeding depression on larval developmental  
134 traits either increased (Fox & Reed, 2011) or decreased (Fox *et al.*, 2011) in  
135 environments of high thermal stress. In particular, the latter experiment found that  
136 inbred individuals were detrimentally affected at the more benign temperature of  
137 20°C as opposed to the higher, elevated temperatures in the previous experiment

138 (Fox *et al.*, 2011). Not only are the results from these experiments seemingly  
139 contradictory but they are also solely focused on measuring inbreeding depression  
140 manifesting on larval developmental traits (survival and generation time) under  
141 *developmental* stress.

142 Therefore, to fully understand the interaction between environmental stress  
143 and inbreeding depression, it is necessary to study its effect on both survival and  
144 fecundity. In addition, exposing individuals to stress across the entirety of their  
145 lifespan, and not just the developmental period, would more accurately reflect  
146 changes to environment predicted as a result of global climatic change. In light of this  
147 and in order to address the paucity of data surrounding inbreeding depression and  
148 thermal stress, we examined the impact of inbreeding and mutation load on the  
149 lifespan and fitness of the model system, *C. maculatus*, when exposed to two  
150 different *lifelong* rearing temperatures, one stressful and one benign.

151

## 152 **Methods**

### 153 *Study system*

154 The seed beetle (*C. maculatus*), native to Africa and Asia, is an agricultural pest that  
155 infests legumes in warehouses and in the field. Females lay their eggs on the surface  
156 of host seeds (Messina, 1991; Fox *et al.*, 2006). Eggs hatch 4–5 days later and  
157 larvae burrow into the seed (Fox *et al.*, 2006). Larvae develop inside the bean, and  
158 the beetles emerge as reproductively mature adults after around 23-27 days. *C.*  
159 *maculatus* beetles are facultatively aphageous – that is, they are able to acquire all  
160 the water and food resources they need from the bean during larval development and  
161 do not require additional resources as adults (Messina & Slade, 1999). In part  
162 because of the ease of laboratory rearing, *C. maculatus* has become a model  
163 organism for the study of sex differences in life history evolution (Fox, 1994; Fox *et*

164 *al.*, 2006, 2007; Bilde *et al.*, 2009; Maklakov & Fricke, 2009; Fritzsche & Arnqvist,  
165 2013).

166 The study population “South India USA” originated from an outbred stock  
167 population that was collected from infested mung beans (*Vigna radiata*) in Tirunelveli,  
168 India, in 1979. They were then moved by C. W. Fox to the University of Kentucky,  
169 USA, then to Uppsala University in 1992, and finally to the American University of  
170 Paris in 2015. The stock population is kept at aphagy (no food or water) in 1L jars  
171 with 150g of mung beans, and approximately 250 newly hatched beetles are  
172 transferred to new jars with fresh beans every 23-24 days on a continual basis. The  
173 beetles are maintained in climate chambers at 29°C, 50% relative humidity and a  
174 12:12 h light:dark cycle. These laboratory conditions closely resemble their natural  
175 conditions, since their life history is adapted to a storage environment (Messina,  
176 1991; Fox, 1994).

177

### 178 *Experimental groups*

179 From the base population, we created four experimental treatments that differed in  
180 level of inbreeding as well as rearing temperature. The first step was to generate  
181 “inbred” (I) beetles, which were the offspring of full sibling pairs. To do this, fertilized  
182 beans were transferred from the stock jars to virgin chambers (aerated plastic culture  
183 plates with a separate well for each individual) and monitored daily. Approximately 24  
184 hours after hatch, one male and one female were randomly paired together and  
185 placed in a 60-mm Petri dish with approximately 80 beans (N = 50). All adults were  
186 removed 48 hours later, and larvae were left to develop.

187 Before the next generation hatched, 48 fertilized beans were moved from  
188 each Petri dish to individually labelled 48-well virgin chamber plates, which were  
189 monitored daily. Approximately 24 hours after hatch, one sister and one brother from  
190 each 48-well plate were placed together into a 60-mm dish with approximately 70

191 beans (N = 50 inbred pairs). Meanwhile, we created 50 “outbred” (O) pairings  
192 between randomly selected one-day-old males and females that had hatched out of  
193 fertilized beans (isolated in virgin chambers) from the background population. All of  
194 the inbred and outbred pairs were created on the same day.

195         Next, we created the four different treatment groups: outbred at the “control”  
196 temperature of 29°C (OC), outbred at the “elevated” temperature of 36°C (OE),  
197 inbred at 29°C (IC), and inbred at 36°C (IE). To do this, approximately 24 hours after  
198 pairing the beetles as described above, ten fertilized beans from each petri (N = 50  
199 inbred and 50 outbred dishes) were randomly selected and placed into two carefully  
200 labeled virgin chambers, five beans per virgin chamber. We selected only those  
201 beans that had eggs on them that appeared to be viable (clear, round and regularly  
202 shaped, firmly attached to the bean). One of the plates was placed into a climate  
203 chamber kept at the control temperature (29°C), and the other plate was placed in a  
204 chamber set to “elevated” temperature (36°C). This higher temperature was selected  
205 because it represents the upper limit of what the beetles can withstand without  
206 devastating impacts on fertility or lifespan (Rogell *et al.*, 2014). Humidity and light:  
207 dark cycles were kept the same for both chambers: 50% humidity and 12:12 h  
208 light:dark. Virgin chambers were monitored daily.

209

### 210 *Daily fecundity and lifespan assays*

211 We monitored the virgin chambers every day and recorded the hatch date and sex of  
212 all eclosed offspring from the four treatments. One day after hatch, we paired the  
213 offspring with a one-day old beetle of the opposite sex from the background  
214 population. Similar to previous steps of the experiment, virgin background beetles  
215 were generated by putting fertilized beans from the control jars into virgin chambers,  
216 and hatch was monitored daily. Pairs were moved at the same time every day from  
217 one Petri dish to another for five days.



218           On the day of pairing (D0), the male and female were placed in a 60-mm Petri  
219 with 65 beans. Females can lay up to 65 eggs per day (E. C. Berg, unpublished  
220 data), and we wanted to provide enough beans so that no more than one egg would  
221 be laid on each bean. On subsequent days (D1, D2, D3, and D4+), pairs were moved  
222 to 35-mm Petri dishes with 30-50 beans (egg-laying declines with age). Once the  
223 pairs were moved to the final dish in the series, they were monitored daily. If at any  
224 point the female was found dead, pairs were obviously not transferred further. All  
225 dead individuals were removed immediately, and dates of death were recorded.

226           To calculate daily fecundity, we recorded the number of eclosed offspring per  
227 dish per target individual. Approximately 35 days after eggs were laid, we froze the  
228 dishes to facilitate counting of eclosed offspring.

229

### 230 *Statistical analyses*

231 All analyses were performed using R v4.0.3 (R Core Team, 2019). Four distinct  
232 measures of reproduction were analysed using the glmmTMB v1.0.2.9000 package  
233 (Brooks *et al.*, 2017; Magnusson *et al.*, 2019) and contained the main effects of  
234 “Breeding status” (inbred or outbred) and “Temperature regime” (control or elevated)  
235 and the subsequent higher-order interaction. In addition, all models contained the  
236 random effect of “Parent ID” in order to account for pseudoreplication of individuals  
237 from the same parent. For age-specific reproduction, additional fixed effects of Day  
238 and Day<sup>2</sup> and an additional random effect of “Individual ID” was added, nested within  
239 “Parent ID”, in order to account for repeatedly measuring the same individual over  
240 time.

241           Whilst the fixed and random effect structure remained similar for each  
242 measure, the distributions of the responses differed slightly. 1) Hatching success was  
243 a binary response, where individuals either hatched (1) or did not (0). 2) For both  
244 age-specific reproduction and lifetime reproductive success (LRS), data was

245 analysed in a two-step process. Firstly, a full Poisson model and a Poisson model  
246 with an observation level random effect was fitted and the residuals simulated using  
247 the DHARMA v0.3.3.0 package (Hartig, 2020). If zero-inflation was detected within  
248 these residuals, an additional zero-inflation component and a variety of error  
249 distributions were fitted. Model selection was then performed to select the best fitting  
250 error distribution and zero-inflation parameters for each measure, chosen as the  
251 model with the lowest Akaike's information criterion (AIC). 3) The last measure was  
252 individual fitness, or  $\lambda_{ind}$ , which represented the dominant eigenvalue of an age-  
253 structured Leslie matrix (Leslie, 1945) calculated using the popbio v2.7 package  
254 (Stubben & Milligan, 2007). For each matrix, the top row denoted age-specific fertility  
255 whilst the subdiagonal represented survival probability from age  $t$  to  $t+1$ . 18-32 days  
256 were also added to the start of the fertility schedule which corresponded to egg-adult  
257 development time under the various breeding and temperature treatments. These  
258 individual fitness values were then analysed with a similar model structure to above,  
259 albeit with a Gaussian error structure.

260 For each measure, the overall effect of "Breeding status", "Temperature  
261 regime", and the interaction between the two, was identified using the Anova function  
262 from the car v3.0-10 package. In addition, data was either visualised using the  
263 ggplot2 v3.3.3 package (Wickham, 2009) or on bootstrapped estimation plots from  
264 the dabestR v0.3.0 package (Ho *et al.*, 2019). Estimated marginal means were  
265 reported using the emmeans v1.5.5-1 package (Lenth *et al.*, 2019).

266 Lastly, we analysed how "Temperature regime" and "Breeding status"  
267 influenced survival and lifespan. For this we used Mixed Effects Cox Proportional  
268 Hazards Models from the coxme package v2.2-16 (Therneau, 2012) and fit similar  
269 models to above. Hazard ratios were then visualised with forest plots created using  
270 ggplot2.

271

272 **Results**

273 *Development Time*

274 Development was significantly influenced by breeding status, temperature regime  
275 and the interaction between the two ( $\chi^2(1) = 5.25, p = 0.022$ ,  $\chi^2(1) = 480.75, p$   
276  $<0.001$  and  $\chi^2(1) = 6.49, p = 0.011$ , respectively; Fig. 1). In particular, outbred  
277 individuals had a significantly quicker development time in comparison to inbred  
278 individuals (Outbred = 21.5 days; Inbred = 22.1 days; *Difference* = -0.56,  $p <0.001$ ,  
279 Fig. 1, Table S1A). As expected, individuals at elevated temperatures developed  
280 quicker than those in the control regime (Control = 23.0 days; Elevated = 20.6 days;  
281 *Difference* = -2.44,  $p <0.001$ , Fig. 1, Table S1A). Importantly, the detrimental effects  
282 of increased mutation load were exacerbated at higher temperatures (OC (22.8 days)  
283 – IC (23.2 days): *difference* = -0.348,  $p = 0.02$ ; OE (20.2 days) – IE (21.1 days)  
284 *difference* = -0.831,  $p <0.001$ ; Fig 1, Table S1B/C).

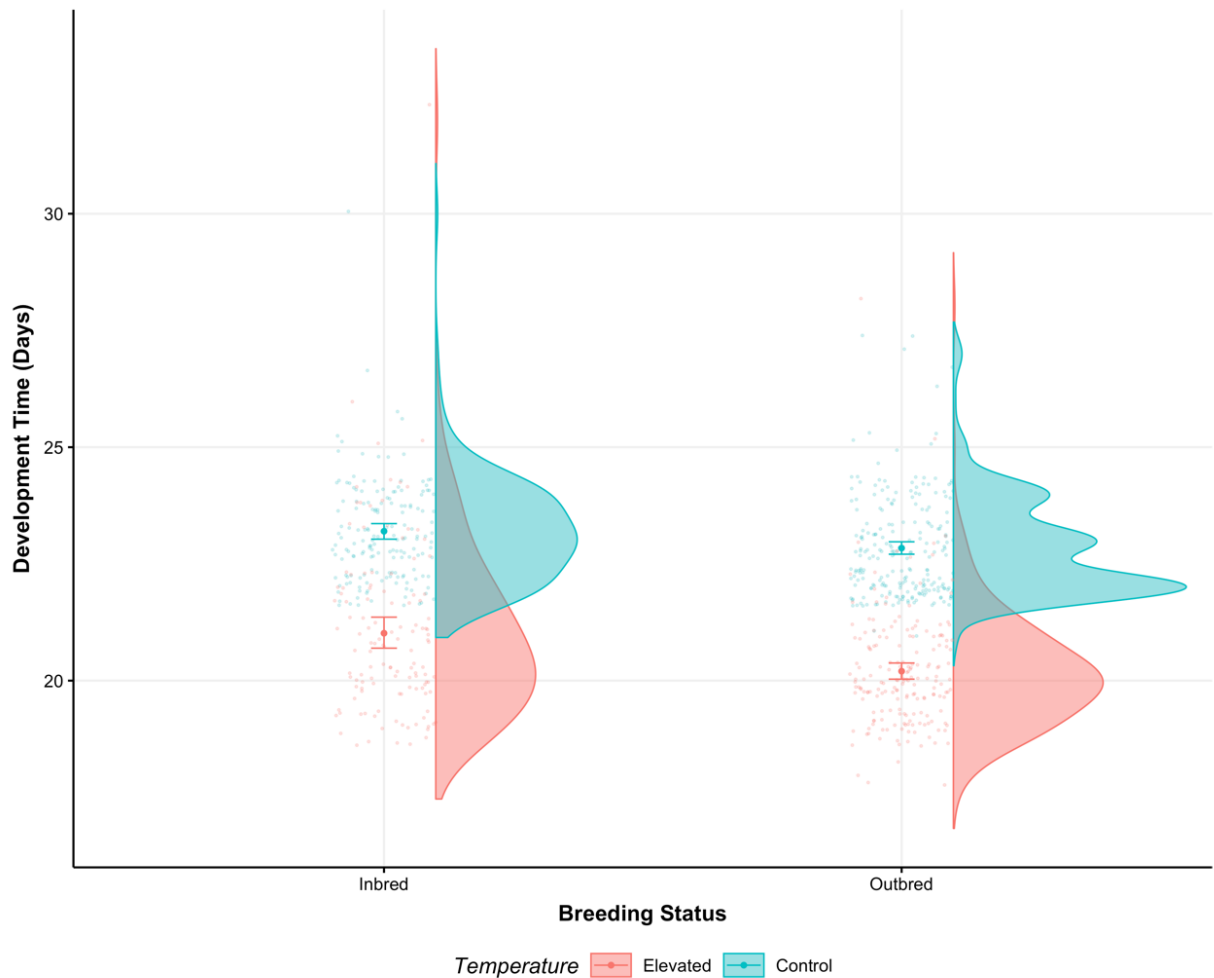

285

286 **Fig. 1** Development time of inbred and outbred populations at control (blue) and  
287 elevated (red) temperatures. Points with error bars represent mean values with 95%  
288 confidence intervals. Marginal violin plots show the relative distribution of raw data.

289

### 290 *Hatching Success*

291 Hatching success was significantly influenced by breeding status, temperature  
292 regime and the interaction between the two ( $\chi^2(1) = 35.94, p < 0.001, \chi^2 = 25.09, p$   
293  $< 0.001, \chi^2(1) = 3.89$  and  $p = 0.049$ , respectively; Fig. 2). More specifically, hatching  
294 success was higher in individuals that were outbred and had a decreased mutation  
295 load (Outbred = 87%; Inbred = 59%; *Odds ratio* = 4.50,  $p < 0.001$ ; Table S2A) or were  
296 exposed to control temperatures and to a less stressful environment (Control = 84%;

297 Elevated = 66%; *Odds ratio* = 2.67,  $p < 0.001$ ; Table S2A). This interaction resulted in  
298 outbred individuals raised at control temperatures having the greatest hatching  
299 success in comparison to other treatments (OC (94%) – OE (78%): *odds ratio* = 4.19,  
300  $p < 0.001$ ; IE (50%): *odds ratio* = 14.64,  $p < 0.001$ ; IC (68%): *odds ratio* = 6.91,  $p$   
301  $< 0.001$ ; Fig. 2; Table S2B/C).

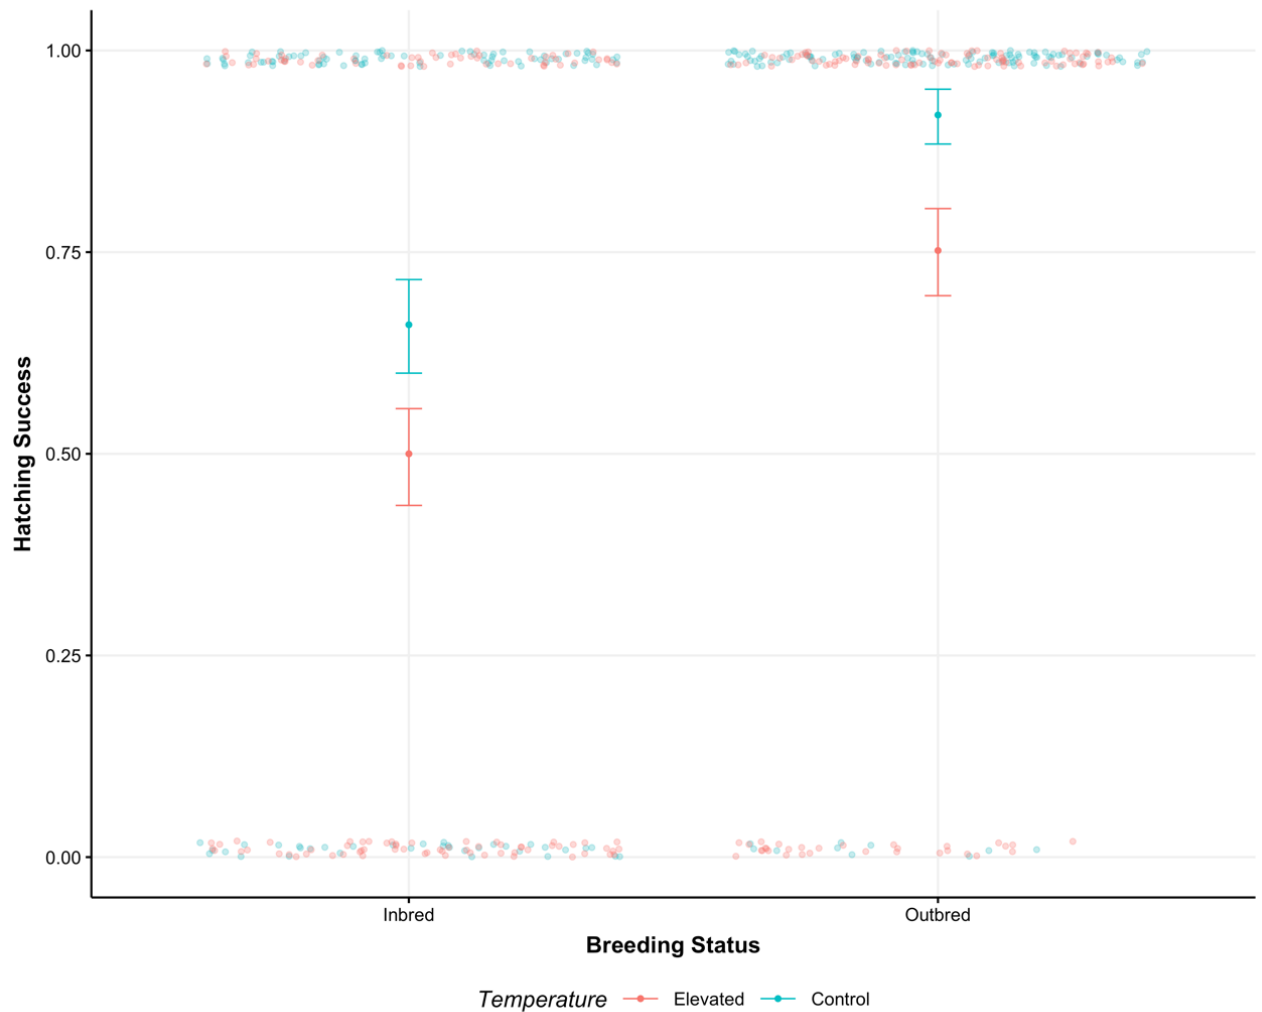

302

303 **Fig. 2** Hatching success in inbred and outbred populations at control (blue) and  
304 elevated (red) temperatures. Points between 0 and 1 represent mean values with  
305 95% confidence intervals.

306

307 *Reproduction*

308 Age-specific reproduction, LRS and  $\lambda_{ind}$  were all significantly influenced by  
309 temperature (ASR:  $\chi^2(1) = 5.16$ ,  $p = 0.023$ ; LRS:  $\chi^2(1) = 279.75$ ,  $p < 0.001$ ;  $\lambda_{ind}$ :  $\chi^2(1)$   
310  $= 36.57$ ,  $p < 0.001$ ; Fig 3-5, Table S3A-5C) but not breeding status, with no significant  
311 difference detected between outbred and inbred individuals (ASR:  $\chi^2(1) = 0.003$ ,  $p =$   
312  $0.958$ , LRS:  $\chi^2(1) = 0.145$ ,  $p = 0.703$ , Table ;  $\lambda_{ind}$ :  $\chi^2(1) = 0.988$ ,  $p = 0.320$ ; Fig 3-5,  
313 Table S3A-5C). In all cases, elevated temperature was associated with decreased  
314 fitness (LRS: Control = 80.0; Elevated = 36.1, *Ratio* = 2.22,  $p < 0.001$ ;  $\lambda_{ind}$ : Control =  
315 1.13; Elevated = 0.88, *estimate* = 0.25,  $p < 0.001$ ; Fig 4-5, Table S4A-5C).  
316 Importantly, differences in LRS between inbred and outbred individuals only  
317 manifested at elevated temperatures (LRS interaction:  $\chi^2(1) = 4.08$ ,  $p = 0.043$ ; Fig 4,  
318 Table 4A-C), where the negative effects of higher temperatures were exacerbated by  
319 increased mutation load (OC (80.7) – IC (79.6): *ratio* = 1.01,  $p = 0.704$ ; OE (38.5) –  
320 IE (32.7): *ratio* = 1.18,  $p = 0.02$ ; Fig 4, Table 4A-C). No significant interaction  
321 between temperature and breeding status was detected for ASR ( $\chi^2(1) = 0.429$ ,  $p =$   
322  $0.512$ ) and  $\lambda_{ind}$  ( $\chi^2(1) = 0.373$ ,  $p = 0.541$ ; Fig 3/5, Table S3A-C/S5A-C).  
323

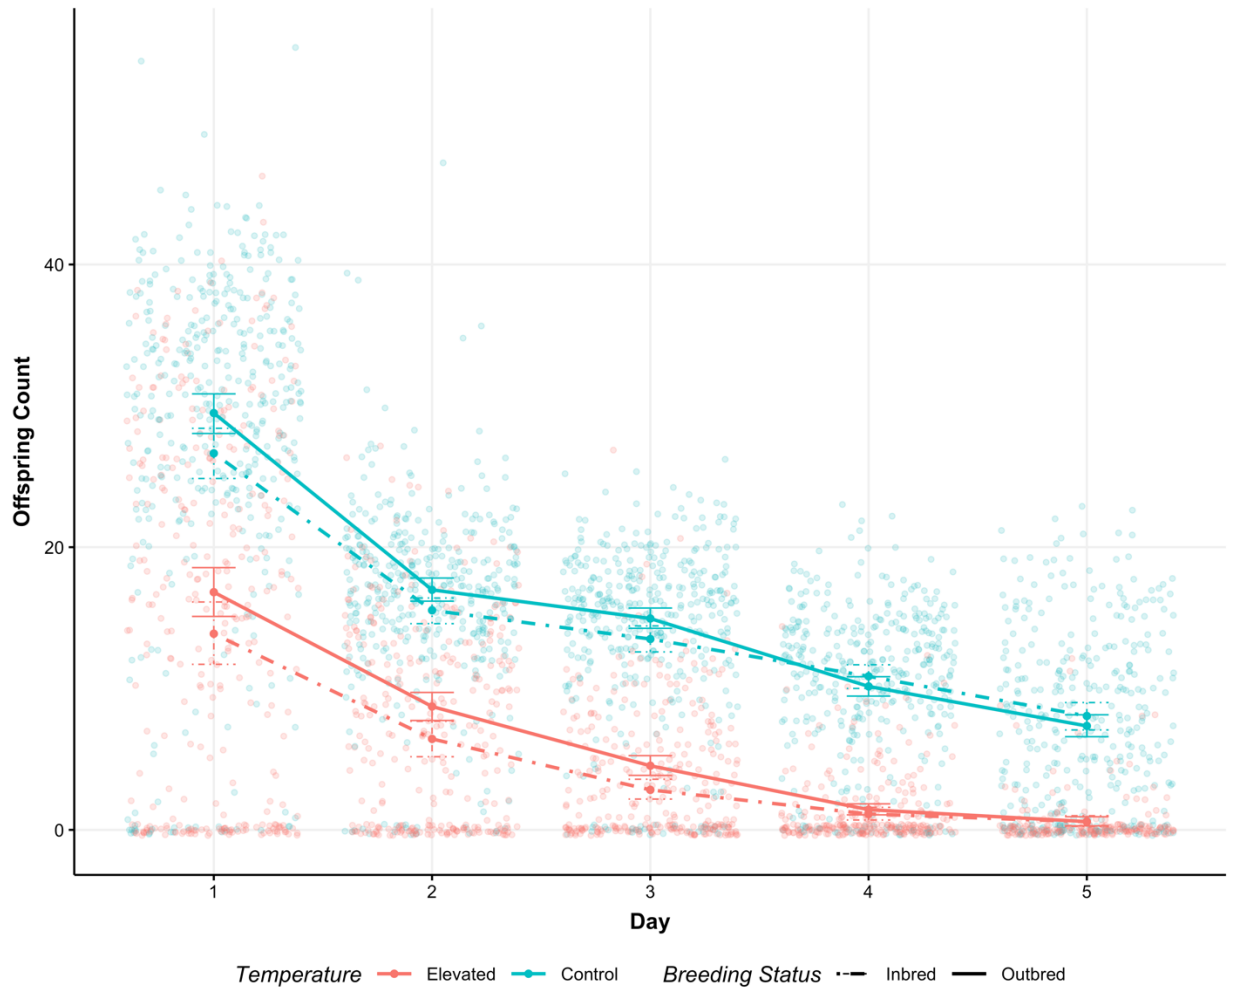

324

325 **Fig. 3** Age-specific reproduction of inbred (solid) or outbred (dot-dash) individuals in

326 elevated (red) or control (blue) temperatures. Points represent means with

327 accompanying 95% confidence intervals.

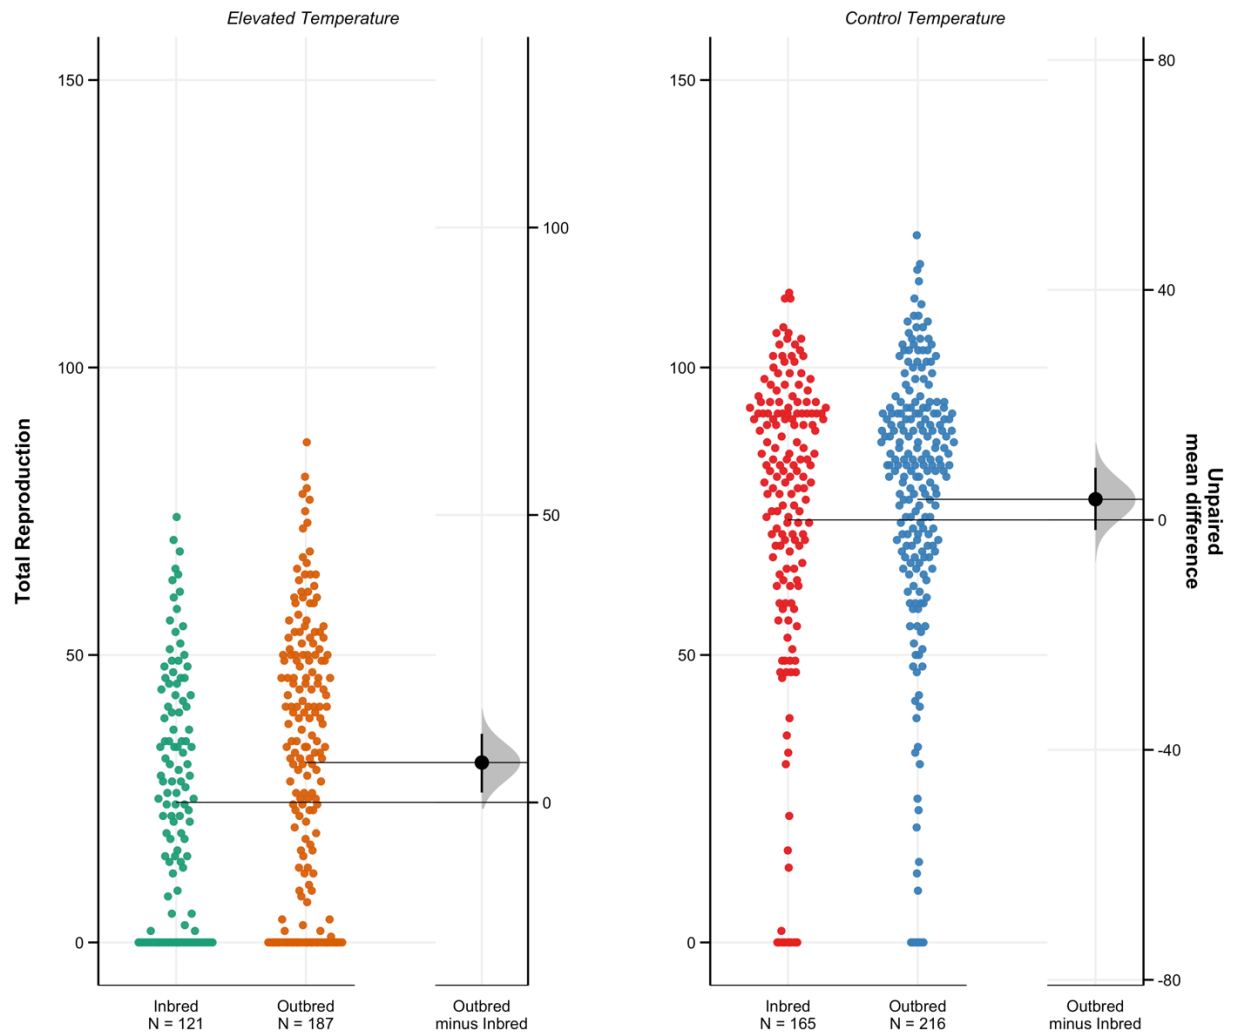

328

329 **Fig. 4** Total reproduction between inbred and outbred individuals at elevated (left)

330 and control (right) temperatures. Each panel shows the raw data and bootstrapped

331 mean differences between treatments with 95% confidence intervals.



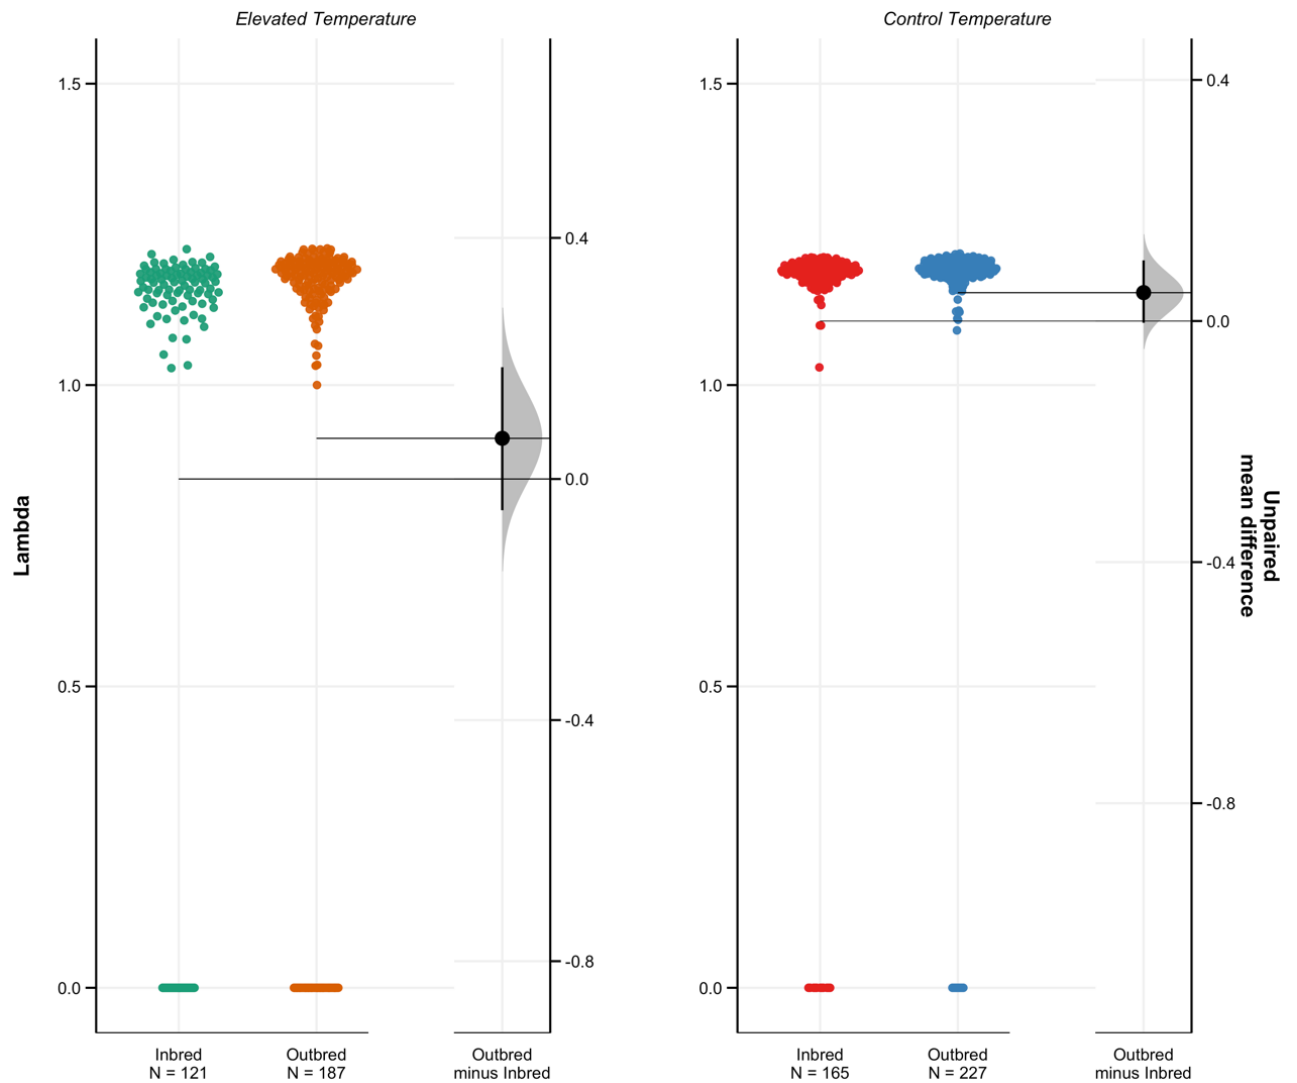

332

333 **Fig. 5** Individual fitness of inbred and outbred individuals at elevated (left) and control  
334 (right) temperatures. Each panel shows the raw data and bootstrapped mean  
335 differences between treatments with 95% confidence intervals.

336

### 337 *Survival and Longevity*

338 Individual survival and lifespan were significantly affected by temperature regime  $\chi^2$   
339 (1) = 183.03,  $p < 0.001$ ) but not breeding status ( $\chi^2$  (1) = 0.981,  $p = 0.322$ ) or the  
340 interaction between the two ( $\chi^2$  (1) = 0.929,  $p = 0.335$ ). Individuals raised at control  
341 temperatures have reduced mortality risk and longer lifespans in comparison to those  
342 from elevated temperatures regardless of breeding status (OC-IC: *estimate* = 0.012,

343  $p = 0.906$ ; OC-OE: *estimate* = -1.197,  $p < 0.001$ ; OC-IE: *estimate* = -1.030,  $p < 0.001$ ;

344 OE-IE: *estimate* = 0.167,  $p = 0.169$ ; Fig. 6/7, Table S6A/B).

345

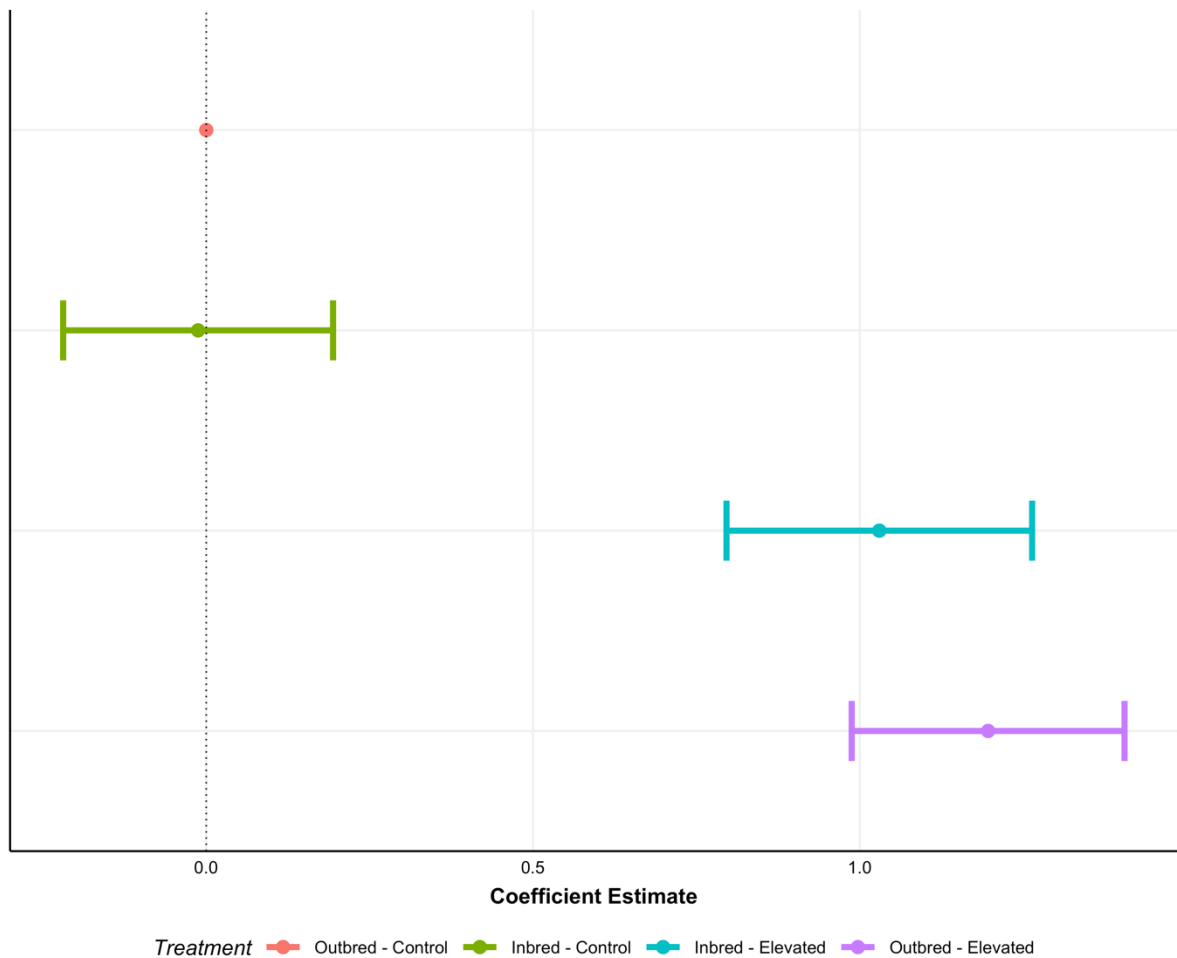

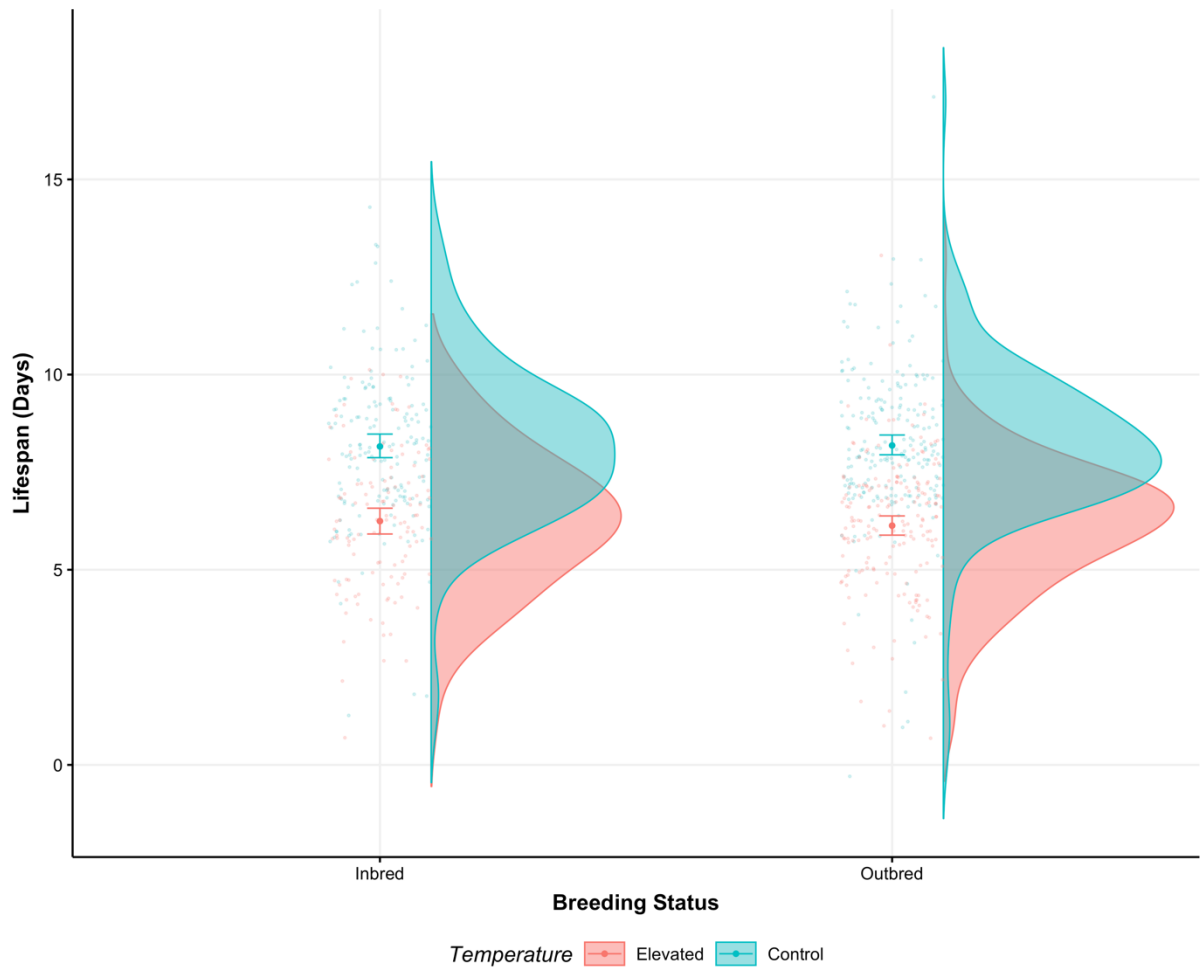

352

353 **Fig. 7** Lifespan of inbred and outbred populations at control (blue) and elevated (red)

354 temperatures. Points with error bars represent mean values with 95% confidence

355 intervals. Marginal violin plots show the relative distribution of raw data.

356

### 357 **Discussion**

358 Our results provide compelling evidence to suggest that increased mutation load

359 from inbreeding exacerbates the negative effects of elevated temperature on various

360 measures and components of fitness. Specifically, we found that increasing

361 temperature and thus exposure to environmental stress had large negative effects on

362 five out of the six measured life history traits. This result alone is unsurprising, as

363 previous work in the same species of beetle has reported similar detrimental effects

364 of high temperature, including reduced reproductive fitness and longevity (Rogell et

365 *al.*, 2014; Berger *et al.*, 2017), but also on the increase of genome-wide *de novo*  
366 mutations (Berger *et al.*, 2020). Only on development time was the effect of  
367 increasing temperature less obvious. On one hand, faster development time with  
368 elevated temperature could be seen as adaptive, as earlier breeding positively  
369 influences rate-sensitive fitness (Sibly & Calow, 1986). Under some circumstances,  
370 this could compensate for reduced LRS by increasing  $\lambda_{ind}$ . However, as this  
371 measure ( $\lambda_{ind}$ ) is entirely dependent on the amount of pre-reproductive time prior to  
372 fertility, the variation in development time due to temperature (ranging from 18-32  
373 days) has little impact on the individual fitness value calculated (see Green & Painter,  
374 1975). This is perhaps one reason why we do not see as great a difference in  $\lambda_{ind}$  as  
375 with LRS. On the other hand, faster development could also be maladaptive,  
376 particularly if the increased growth rate results in higher mortality and reduced body  
377 size, which will contribute to reduced fecundity (Sibly *et al.*, 1985; Sibly & Calow,  
378 1986). Only when a species becomes adapted to a particular thermal regime (Rogell  
379 *et al.*, 2014) or if the environment between parents and offspring is predictable (Sibly  
380 & Calow, 1986; Lind *et al.*, 2020) do the harmful effects of increasing temperature  
381 begin to subside. However, in contrast to previous work (Yun & Agrawal, 2014), we  
382 found that thermal stress, in the absence of any form of density dependence, was  
383 sufficient in magnitude to result in increased inbreeding depression on development  
384 time, hatching probability and, lifetime reproductive success.

385         This result is similar in trend to the positive correlation between  
386 developmental stress and larval mortality found in several studies in the same  
387 organism (Fox & Reed, 2011; Springer *et al.*, 2020). Similarly, a recent study by  
388 Springer *et al.* (2020) found a negative effect on female mass, a proxy for female  
389 fecundity; however, this was only present within an interaction with another variable,  
390 beetle host plant. Nevertheless, in this study we show that *lifelong* stress (i.e. not  
391 simply confined to the developmental period) can significantly and detrimentally

392 influence fitness through a reduction in lifetime reproductive success in addition to  
393 increasing larval mortality. In addition, we also present another form of inbreeding-  
394 environment interaction, in which the control temperature of 29°C also produced  
395 significantly reduced hatching probability in inbred individuals which mirrors results  
396 from previous work (Fox *et al.*, 2011).

397         Why such inbreeding-environment interactions should produce deleterious  
398 effects on fitness requires an explanation. In a series of elegant studies, Kristensen  
399 *et al.* (2002, 2005, 2006) found that inbred *Drosophila* flies were disproportionately  
400 expressing genes relating to metabolism and stress response in comparison to  
401 outbred individuals (Kristensen *et al.*, 2005). In particular, they found that the heat-  
402 shock protein (*Hsp70*) was expressed at higher levels in benign laboratory conditions  
403 when individuals were inbred. Importantly, the expression of *Hsp70* is associated  
404 with severe and detrimental costs to fitness (Krebs & Feder, 1997; Kristensen *et al.*,  
405 2002). Additionally, when inbred flies were exposed to environmental stress through  
406 increasing temperature, they again found differential expression of several important  
407 metabolic genes in a synergistic fashion (Kristensen *et al.*, 2006). Taken together,  
408 these results, coupled with previous research, suggests that the inbred lines here,  
409 which were exposed to both genetic and environmental stress, could be expressing a  
410 wide variety of genes that ultimately are contributing to reduced fitness. Future  
411 research should focus on understanding whether the same candidate loci found in  
412 *Drosophila* are expressed in *C. maculatus* when exposed to both environmental and  
413 genetic stress.

414         The exacerbated negative effects we show here, despite the exposure to the  
415 reduced environmental stress of the laboratory (Hedrick & Kalinowski, 2000),  
416 highlights the severe and detrimental impact that global climatic changes coupled  
417 with habitat fragmentation could have on the survivability of small populations. It is  
418 therefore critically important for future conservation research to study these

419 inbreeding-stress interactions in more complex environments using natural  
420 populations and with a wide variety of stressors.

421

#### 422 **Acknowledgements**

423 Financial support for this project was provided by ERC GermlineAgeingSoma 724909  
424 to AAM and by The American University of Paris to ECB. The authors declare no  
425 conflicts of interest.

426

#### 427 **Data Accessibility Statement**

428 Data will be deposited in Dryad.

429

#### 430 **References**

- 431 Agrawal, A.F. & Whitlock, M.C. 2010. Environmental duress and epistasis:  
432 how does stress affect the strength of selection on new mutations?  
433 *Trends in Ecology & Evolution* **25**: 450–458.
- 434 Armbruster, P. & Reed, D.H. 2005. Inbreeding depression in benign and  
435 stressful environments. *Heredity* **95**: 235–242. Nature Publishing  
436 Group.
- 437 Barnett, T.P., Pierce, D.W. & Schnur, R. 2001. Detection of anthropogenic  
438 climate change in the world's oceans. *Science* **292**: 270–274. American  
439 Association for the Advancement of Science.
- 440 Berger, D., Stångberg, J., Baur, J. & Walters, R.J. 2020. Elevated temperature  
441 increases genome-wide selection on de novo mutations. *bioRxiv*  
442 268011. Cold Spring Harbor Laboratory.
- 443 Berger, D., Stångberg, J., Grieshop, K., Martinossi-Allibert, I. & Arnqvist, G.  
444 2017. Temperature effects on life-history trade-offs, germline  
445 maintenance and mutation rate under simulated climate warming.  
446 *Proceedings of the Royal Society B: Biological Sciences* **284**:  
447 20171721. Royal Society.
- 448 Bijlsma, Bundgaard & Putten, V. 1999. Environmental dependence of  
449 inbreeding depression and purging in *Drosophila melanogaster*.  
450 *Journal of Evolutionary Biology* **12**: 1125–1137.
- 451 Bilde, T., Maklakov, A.A., Meisner, K., la Guardia, L. & Friberg, U. 2009. Sex  
452 differences in the genetic architecture of lifespan in a seed beetle:

- 453 extreme inbreeding extends male lifespan. *BMC Evolutionary Biology*  
454 **9**: 33. Springer.
- 455 Blows, M.W. & Hoffmann, A.A. 2005. A reassessment of genetic limits to  
456 evolutionary change. *Ecology* **86**: 1371–1384. Wiley Online Library.
- 457 Both, C., Bouwhuis, S., Lessells, C.M. & Visser, M.E. 2006. Climate change  
458 and population declines in a long-distance migratory bird. *Nature* **441**:  
459 81–83. Nature Publishing Group.
- 460 Brooks, M.E., Kristensen, K., van Benthem, K.J., Magnusson, A., Berg, C.W.,  
461 Nielsen, A., *et al.* 2017. glmmTMB balances speed and flexibility  
462 among packages for zero-inflated generalized linear mixed modeling. *R*  
463 *Journal*, doi: 10.32614/rj-2017-066.
- 464 Charlesworth, D. & Charlesworth, B. 1987. Inbreeding Depression and its  
465 Evolutionary Consequences. *Annual Review of Ecology and*  
466 *Systematics* **18**: 237–268. Annual Reviews.
- 467 Charlesworth, D. & Willis, J.H. 2009. The genetics of inbreeding depression.  
468 *Nature Reviews Genetics* **10**: 783–796. Nature Publishing Group.
- 469 Davis, M.B. & Shaw, R.G. 2001. Range shifts and adaptive responses to  
470 Quaternary climate change. *Science* **292**: 673–679. American  
471 Association for the Advancement of Science.
- 472 Fox, C.W. 1994. The influence of egg size on offspring performance in the  
473 seed beetle, *Callosobruchus maculatus*. *Oikos* 321–325. JSTOR.
- 474 Fox, C.W. & Reed, D.H. 2011. Inbreeding Depression Increases with  
475 Environmental Stress: An Experimental Study and Meta-Analysis.  
476 *Evolution* **65**: 246–258.
- 477 Fox, C.W. & Reed, D.H. 2010. Inbreeding depression increases with maternal  
478 age in a seed-feeding beetle. *Evolutionary Ecology Research* **12**: 961–  
479 972. Evolutionary Ecology, Ltd.
- 480 Fox, C.W., Scheibly, K.L., Smith, B.P. & Wallin, W.G. 2007. Inbreeding  
481 depression in two seed-feeding beetles, *Callosobruchus maculatus* and  
482 *Stator limbatus* (Coleoptera: Chrysomelidae). *Bulletin of Entomological*  
483 *Research* **97**: 49. Cambridge University Press.
- 484 Fox, C.W., Scheibly, K.L., Wallin, W.G., Hitchcock, L.J., Stillwell, R.C. &  
485 Smith, B.P. 2006. The genetic architecture of life span and mortality  
486 rates: gender and species differences in inbreeding load of two seed-  
487 feeding beetles. *Genetics* **174**: 763–773. Genetics Soc America.
- 488 Fox, C.W. & Stillwell, R.C. 2009. Environmental effects on sex differences in  
489 the genetic load for adult lifespan in a seed-feeding beetle. *Heredity*  
490 **103**: 62–72. Nature Publishing Group.

- 491 Fox, C.W., Stillwell, R.C., Wallin, W.G., Curtis, C.L. & Reed, D.H. 2011.  
492 Inbreeding-environment interactions for fitness: complex relationships  
493 between inbreeding depression and temperature stress in a seed-  
494 feeding beetle. *Evolutionary Ecology* **25**: 25–43. Springer.
- 495 Franke, K. & Fischer, K. 2015. Inbreeding interferes with the heat-shock  
496 response. *Heredity (Edinb)* **114**: 80–84.
- 497 Franks, S.J. & Weis, A.E. 2008. A change in climate causes rapid evolution of  
498 multiple life-history traits and their interactions in an annual plant.  
499 *Journal of Evolutionary Biology* **21**: 1321–1334. Wiley Online Library.
- 500 Fritzsche, K. & Arnqvist, G. 2013. Homage to Bateman: sex roles predict sex  
501 differences in sexual selection. *Evolution* **67**: 1926–1936. Wiley Online  
502 Library.
- 503 Gibbs, J.P. 2001. Demography versus habitat fragmentation as determinants  
504 of genetic variation in wild populations. *Biological Conservation* **100**:  
505 15–20.
- 506 Gottfried, M., Pauli, H., Futschik, A., Akhalkatsi, M., Barančok, P., Benito  
507 Alonso, J.L., *et al.* 2012. Continent-wide response of mountain  
508 vegetation to climate change. *Nature Climate Change* **2**: 111–115.  
509 Nature Publishing Group.
- 510 Green, R. & Painter, P.R. 1975. Selection for Fertility and Development Time.  
511 *The American Naturalist* **109**: 1–10. [University of Chicago Press,  
512 American Society of Naturalists].
- 513 Hartig, F. 2020. DHARMA: Residual Diagnostics for Hierarchical (Multi-Level /  
514 Mixed) Regression Models. R package.
- 515 Hedrick, P.W. & Kalinowski, S.T. 2000. Inbreeding Depression in  
516 Conservation Biology. *Annual Review of Ecology and Systematics* **31**:  
517 139–162.
- 518 Hickling, R., Roy, D.B., Hill, J.K., Fox, R. & Thomas, C.D. 2006. The  
519 distributions of a wide range of taxonomic groups are expanding  
520 polewards. *Global Change Biology* **12**: 450–455.
- 521 Ho, J., Tumkaya, T., Aryal, S., Choi, H. & Claridge-Chang, A. 2019. Moving  
522 beyond P values: data analysis with estimation graphics. *Nature*  
523 *Methods* **16**: 565–566.
- 524 Holt, R.D. 1990. The microevolutionary consequences of climate change.  
525 *Trends in Ecology & Evolution* **5**: 311–315. Elsevier.
- 526 Huisman, J., Kruuk, L.E.B., Ellis, P.A., Clutton-Brock, T. & Pemberton, J.M.  
527 2016. Inbreeding depression across the lifespan in a wild mammal  
528 population. *PNAS* **113**: 3585–3590. National Academy of Sciences.



- 529 Jiguet, F., Gadot, A.-S., Julliard, R., Newson, S.E. & Couvet, D. 2007. Climate  
530 envelope, life history traits and the resilience of birds facing global  
531 change. *Global Change Biology* **13**: 1672–1684. Wiley Online Library.
- 532 Keller, L.F. & Waller, D.M. 2002. Inbreeding effects in wild populations.  
533 *Trends in Ecology & Evolution* **17**: 230–241.
- 534 Kirkpatrick, M. & Jarne, P. 2000. The effects of a bottleneck on inbreeding  
535 depression and the genetic load. *The American Naturalist* **155**: 154–  
536 167. The University of Chicago Press.
- 537 Krebs, R.A. & Feder, M.E. 1997. Deleterious consequences of Hsp70  
538 overexpression in *Drosophila melanogaster* larvae. *Cell Stress*  
539 *Chaperones* **2**: 60–71.
- 540 Kristensen, T.N., Dahlggaard, \* Jesper & Loeschcke, V. 2002. Inbreeding  
541 affects Hsp70 expression in two species of *Drosophila* even at benign  
542 temperatures. *Evol Ecol Res* **4**: 1209–1216. Evolutionary Ecology, Ltd.
- 543 Kristensen, T.N., Sørensen, P., Kruhøffer, M., Pedersen, K.S. & Loeschcke,  
544 V. 2005. Genome-Wide Analysis on Inbreeding Effects on Gene  
545 Expression in *Drosophila melanogaster*. *Genetics* **171**: 157–167.  
546 Genetics.
- 547 Kristensen, T.N., Sørensen, P., Pedersen, K.S., Kruhøffer, M. & Loeschcke,  
548 V. 2006. Inbreeding by Environmental Interactions Affect Gene  
549 Expression in *Drosophila melanogaster*. *Genetics* **173**: 1329–1336.  
550 Genetics.
- 551 Leimu, R., Mutikainen, P.I.A., Koricheva, J. & Fischer, M. 2006. How general  
552 are positive relationships between plant population size, fitness and  
553 genetic variation? *Journal of Ecology* **94**: 942–952. Wiley Online  
554 Library.
- 555 Lenth, R., Singmann, H., Love, J., Buerkner, P. & Herve, M. 2019. *emmeans*:  
556 *Estimated Marginal Means, aka Least-Squares Means (Version 1.3. 4)*.
- 557 Leslie, P.H. 1945. On the Use of Matrices in Certain Population Mathematics.  
558 *Biometrika* **33**: 183–212.
- 559 Liao, W. & Reed, D.H. 2009. Inbreeding–environment interactions increase  
560 extinction risk. *Animal Conservation* **12**: 54–61.
- 561 Lind, M.I., Zwoinska, M.K., Andersson, J., Carlsson, H., Krieg, T., Larva, T., *et*  
562 *al.* 2020. Environmental variation mediates the evolution of anticipatory  
563 parental effects. *Evolution Letters* **4**: 371–381.
- 564 Magnusson, A., Skaug, H.J., Nielsen, A., Berg, C., Kristensen, K., Maechler,  
565 M., *et al.* 2019. Package 'glmmTMB'. *R package version 0.1*.

- 566 Maklakov, A.A. & Fricke, C. 2009. Sexual selection did not contribute to the  
567 evolution of male lifespan under curtailed age at reproduction in a seed  
568 beetle. *Ecological Entomology* **34**: 638–643. Wiley Online Library.
- 569 Messina, F.J. 1991. Competitive interactions between larvae from divergent  
570 strains of the cowpea weevil (Coleoptera: Bruchidae). *Environmental*  
571 *Entomology* **20**: 1438–1443. Oxford University Press Oxford, UK.
- 572 Messina, F.J. & Slade, A.F. 1999. Expression of a life-history trade-off in a  
573 seed beetle depends on environmental context. *Physiological*  
574 *Entomology* **24**: 358–363. Wiley Online Library.
- 575 Muñoz, N.J., Farrell, A.P., Heath, J.W. & Neff, B.D. 2015. Adaptive potential of  
576 a Pacific salmon challenged by climate change. *Nature Climate*  
577 *Change* **5**: 163–166. Nature Publishing Group.
- 578 Norberg, J., Urban, M.C., Vellend, M., Klausmeier, C.A. & Loeuille, N. 2012.  
579 Eco-evolutionary responses of biodiversity to climate change. *Nature*  
580 *Climate Change* **2**: 747–751. Nature Publishing Group.
- 581 Opdam, P. & Wascher, D. 2004. Climate change meets habitat fragmentation:  
582 linking landscape and biogeographical scale levels in research and  
583 conservation. *Biological Conservation* **117**: 285–297.
- 584 Orr, H.A. & Betancourt, A.J. 2001. Haldane's Sieve and Adaptation From the  
585 Standing Genetic Variation. *Genetics* **157**: 875–884. Genetics.
- 586 Pachauri, R.K., Allen, M.R., Barros, V.R., Broome, J., Cramer, W., Christ, R.,  
587 *et al.* 2014. *Climate change 2014: synthesis report. Contribution of*  
588 *Working Groups I, II and III to the fifth assessment report of the*  
589 *Intergovernmental Panel on Climate Change*. Ippc.
- 590 Pearson, R.G., Stanton, J.C., Shoemaker, K.T., Aiello-Lammens, M.E., Ersts,  
591 P.J., Horning, N., *et al.* 2014. Life history and spatial traits predict  
592 extinction risk due to climate change. *Nature Climate Change* **4**: 217–  
593 221. Nature Publishing Group.
- 594 Pereira, H.M., Navarro, L.M. & Martins, I.S. 2012. Global Biodiversity Change:  
595 The Bad, the Good, and the Unknown. *Annual Review of Environment*  
596 *and Resources* **37**: 25–50.
- 597 R Core Team. 2019. *R version 3.6. 2: A language and environmental for*  
598 *statistical computing*.
- 599 Rogell, B., Widegren, W., Hallsson, L.R., Berger, D., Björklund, M. &  
600 Maklakov, A.A. 2014. Sex-dependent evolution of life-history traits  
601 following adaptation to climate warming. *Functional Ecology* **28**: 469–  
602 478.
- 603 Root, T.L., Price, J.T., Hall, K.R., Schneider, S.H., Rosenzweig, C. & Pounds,  
604 J.A. 2003. Fingerprints of global warming on wild animals and plants.  
605 *Nature* **421**: 57–60. Nature Publishing Group.

- 606 Rosenzweig, C., Karoly, D., Vicarelli, M., Neofotis, P., Wu, Q., Casassa, G., *et*  
607 *al.* 2008. Attributing physical and biological impacts to anthropogenic  
608 climate change. *Nature* **453**: 353–357. Nature Publishing Group.
- 609 Seebacher, F., White, C.R. & Franklin, C.E. 2015. Physiological plasticity  
610 increases resilience of ectothermic animals to climate change. *Nature*  
611 *Climate Change* **5**: 61–66. Nature Publishing Group.
- 612 Sibly, R. & Calow, P. 1986. Why breeding earlier is always worthwhile.  
613 *Journal of Theoretical Biology* **123**: 311–319.
- 614 Sibly, R., Calow, P. & Nichols, N. 1985. Are patterns of growth adaptive?  
615 *Journal of Theoretical Biology* **112**: 553–574.
- 616 Springer, A.L., Messina, F.J. & Gompert, Z. 2020. Measuring the effect of  
617 environmental stress on inbreeding depression alone obscures the  
618 relative importance of inbreeding–stress interactions on overall fitness  
619 in *Callosobruchus maculatus*. *Evolutionary Applications* **13**: 2597–  
620 2609.
- 621 Stubben, C. & Milligan, B. 2007. Estimating and analyzing demographic  
622 models using the popbio package in R. *Journal of Statistical Software*  
623 **22**: 1–23.
- 624 Therneau, T. 2012. coxme: mixed effects Cox models. R package version 2.2-  
625 3. [www.cran.R-project.org/package=coxme](http://www.cran.R-project.org/package=coxme). *Oikos*, doi:  
626 10.1111/oik.01149.
- 627 Thomas, C.D. 2010. Climate, climate change and range boundaries. *Diversity*  
628 *and Distributions* **16**: 488–495.
- 629 Trisos, C.H., Merow, C. & Pigot, A.L. 2020. The projected timing of abrupt  
630 ecological disruption from climate change. *Nature* **580**: 496–501.  
631 Nature Publishing Group.
- 632 Tylianakis, J.M., Didham, R.K., Bascompte, J. & Wardle, D.A. 2008. Global  
633 change and species interactions in terrestrial ecosystems. *Ecology*  
634 *Letters* **11**: 1351–1363.
- 635 Visser, M.E., Noordwijk, A.J. van, Tinbergen, J.M. & Lessells, C.M. 1998.  
636 Warmer springs lead to mistimed reproduction in great tits (*Parus*  
637 *major*). *Proceedings of the Royal Society of London. Series B:*  
638 *Biological Sciences* **265**: 1867–1870. Royal Society.
- 639 Visser, M.E., Perdeck, A.C., Balen, J.H.V. & Both, C. 2009. Climate change  
640 leads to decreasing bird migration distances. *Global Change Biology*  
641 **15**: 1859–1865.
- 642 Visser, M.E., te Marvelde, L. & Lof, M.E. 2012. Adaptive phenological  
643 mismatches of birds and their food in a warming world. *J Ornithol* **153**:  
644 75–84.

- 645 Wickham, H. 2009. *ggplot2 Elegant Graphics for Data Analysis*.
- 646 Willi, Y., Van Buskirk, J. & Hoffmann, A.A. 2006. Limits to the Adaptive  
647 Potential of Small Populations. *Annual Review of Ecology, Evolution,  
648 and Systematics* **37**: 433–458.
- 649 Yun, L. & Agrawal, A.F. 2014. Variation in the strength of inbreeding  
650 depression across environments: Effects of stress and density  
651 dependence. *Evolution* **68**: 3599–3606.
- 652
